# Supplementary material for: Signal regulatory protein α protects podocytes through promotion of autophagic activity
Source: JCI journal article supplement (doi:10.1172/jci.insight.124747), 2019-03-19
Supplement: sd1 [file 1]

## **Signal Regulatory Protein $\alpha$ Protects Podocytes Through Promoting Autophagic Activity**

Limin Li<sup>1\*</sup>, Ying Liu<sup>1\*</sup>, Shan Li<sup>1\*</sup>, Yong Yang<sup>1</sup>, Caihong Zeng<sup>2</sup>, Weiwei Rong<sup>1</sup>, Hongwei Liang<sup>1,3</sup>, Mingchao Zhang<sup>2</sup>, Xiaodong Zhu<sup>2</sup>, Koby Kidder<sup>3</sup>, Yuan Liu<sup>3¶</sup>, Zhihong Liu<sup>2¶</sup>, and Ke Zen<sup>1¶</sup>

### **List of files:**

Supplementary Figure 1

Supplementary Figure 2

Supplementary Figure 3

Supplementary Figure 4

Supplementary Figure 5

Supplementary Figure 6

Supplementary Figure 7

Supplementary Figure 8

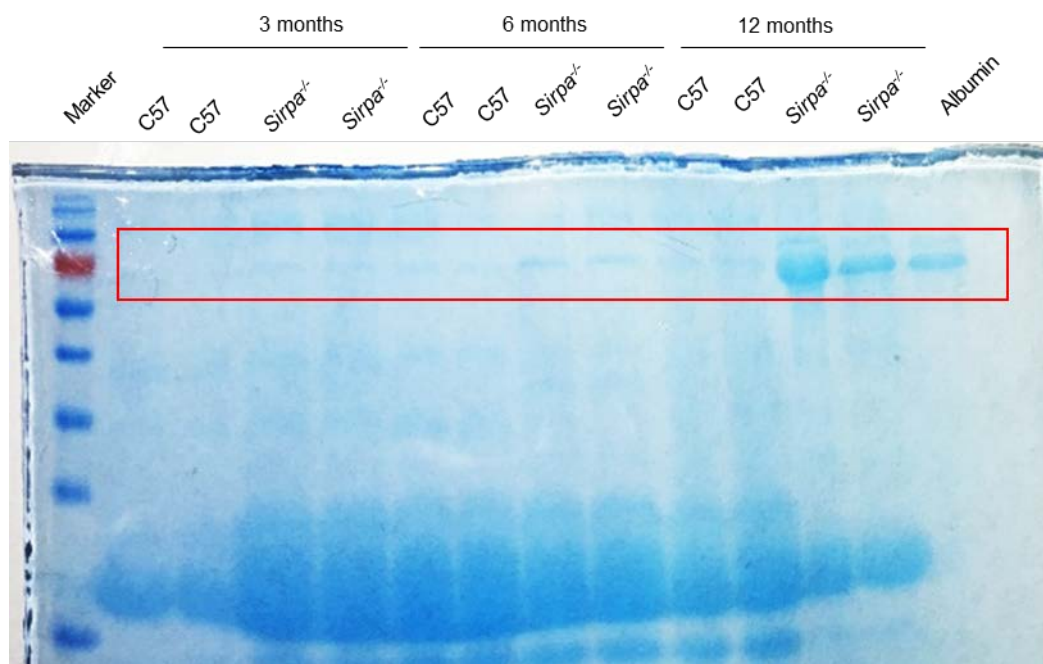

Supplementary Figure 1. Representative Coomassie staining results of urine samples from C57BL/6 and *Sirpa*<sup>-/-</sup> mice at 3, 6 and 12 months of age.

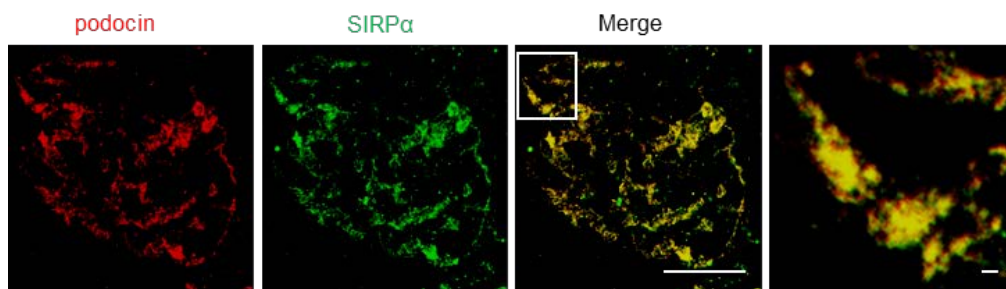

Supplementary Figure 2. SIRP $\alpha$  co-localizes with podocin in mouse glomerulus. Scale bars, 25 $\mu$ m.

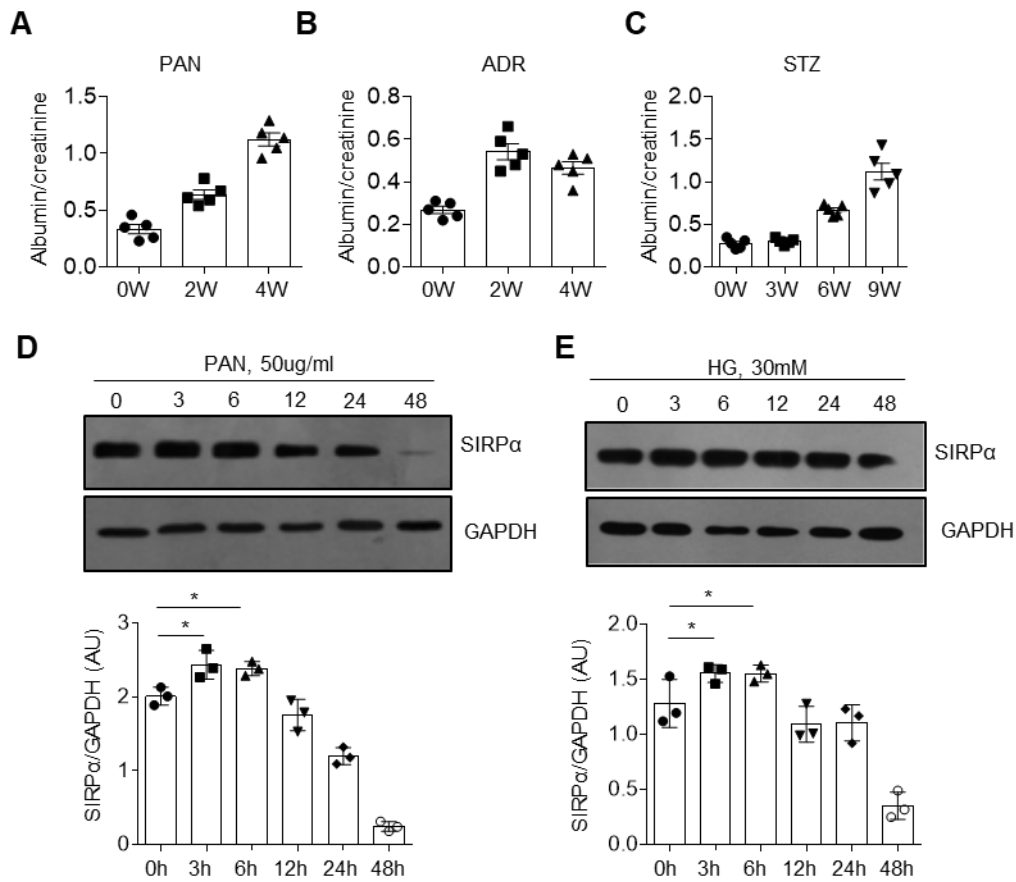

Supplementary Figure 3. Mouse models of renal injury and reduction of podocyte SIRP $\alpha$  following podocyte injury. **A-C**, Albumin-to-creatinine ratio (mg/mg) in C57BL/6 mice treated with ADR, PAN or STZ (5 mice/group). **D** and **E**, SIRP $\alpha$  level in podocyte cell line HPC with PAN, high glucose (HG) treatment over time. Immunoblots are representative of 3 independently performed experiments. Histograms are quantification of SIRP $\alpha$  level. All the data were presented as mean  $\pm$  SEM, and P value was analyzed by ANOVA with Tukey-Kramer test.

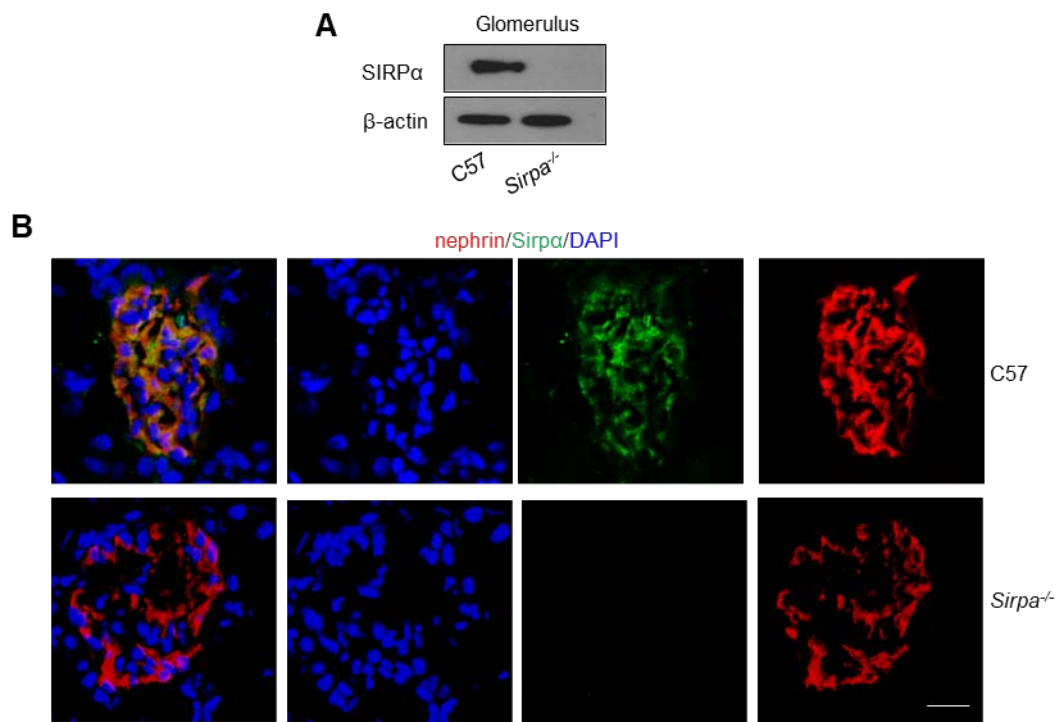

Supplementary Figure 4. Validation of SIRP $\alpha$  knockout in mouse glomerulus. **A**, Glomerular SIRP $\alpha$  was detected by western blotting in C57BL/6 and *Sirpa*<sup>-/-</sup> mice. Immunoblots were representative of 3 independently performed experiments. **B**, SIRP $\alpha$  was detected by immunofluorescence in C57BL/6 and *Sirpa*<sup>-/-</sup> mice. Scale bar, 25 $\mu$ m.

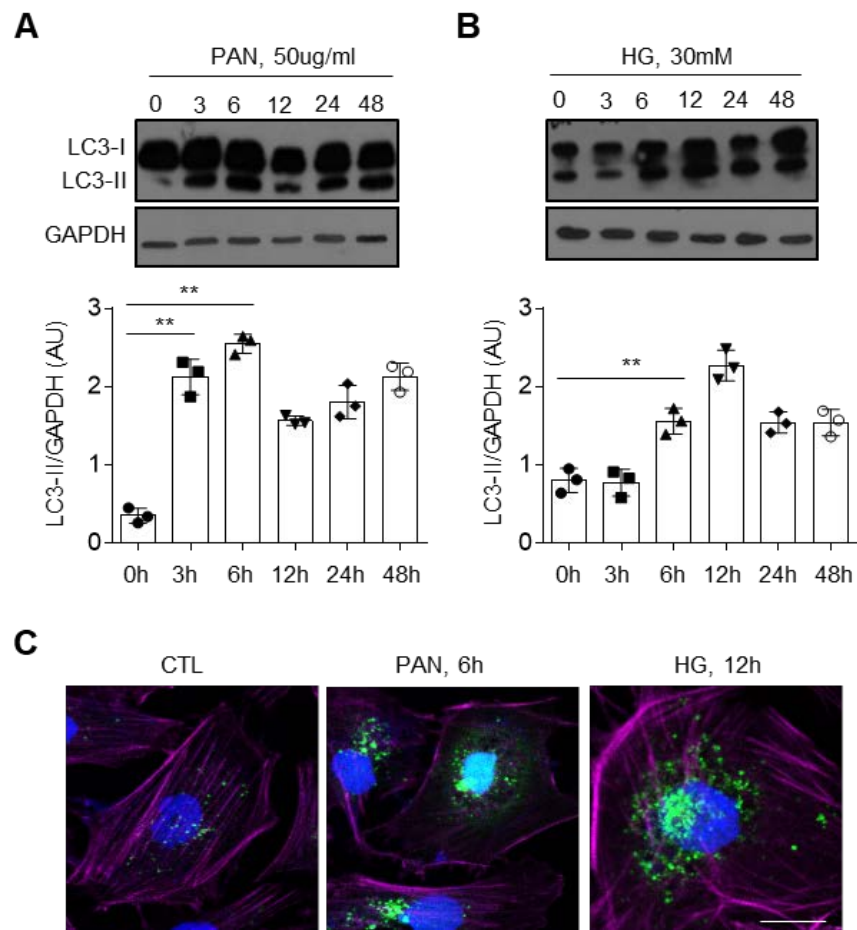

Supplementary Figure 5. LC3 level in human podocyte cell line HPC treated with PAN (**A**) or HG (**B**). Histograms are quantification of LC-II level normalized to GAPDH of three independent experiments. Data were presented as mean  $\pm$  SEM, and P value was analyzed by ANOVA with Tukey-Kramer test. **C**, Autophagosomes in GFP-LC3-transgenic HPC treated with PAN or HG for 6 h or 12 h in the presence of CQ. Scale bar, 25 $\mu$ m.

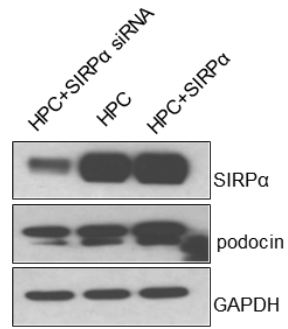

Supplementary Figure 6. Expression level of podocin in HPC is regulated by SIRP $\alpha$ . Immunoblots are representative of 3 independently performed experiments.

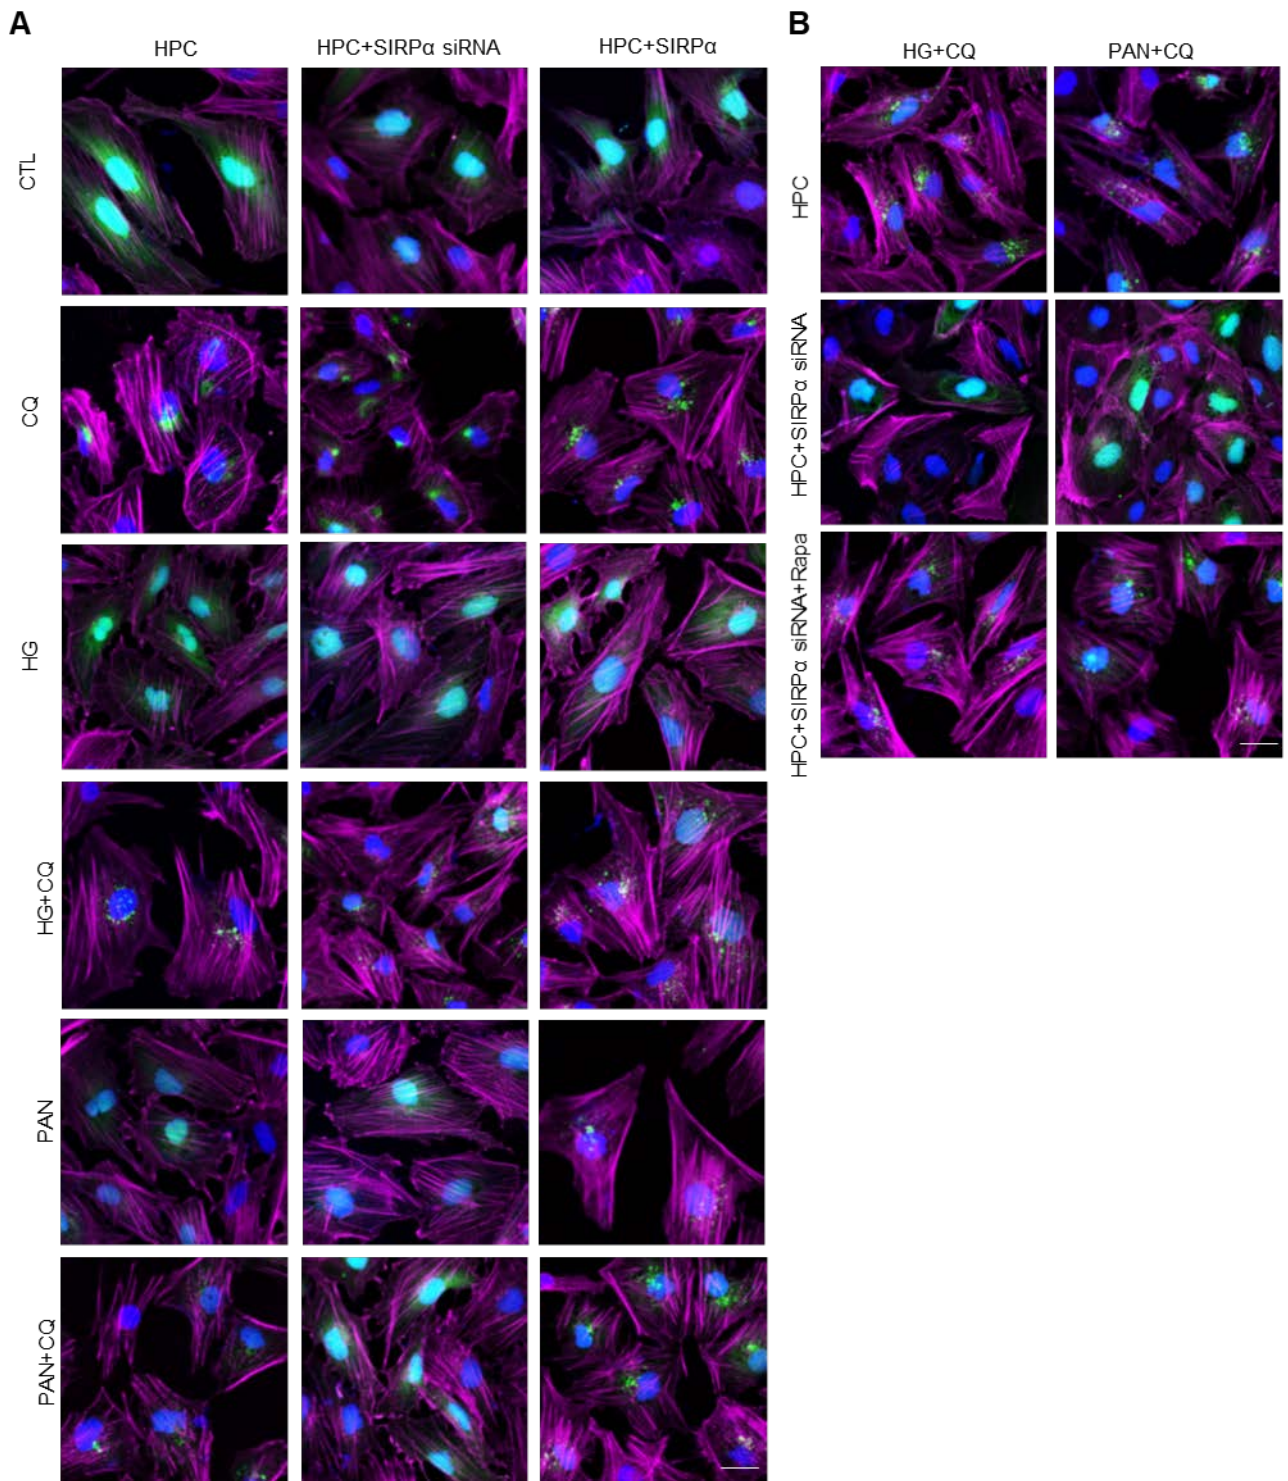

Supplementary Figure 7. Analysis of autophagosomes in podocytes with various treatments using immune staining. A and B, Autophagosomes in GFP-LC3-transgenic HPC following different treatment. The results are representative of 3 independently performed experiments. Scale bar, 25 $\mu$ m.



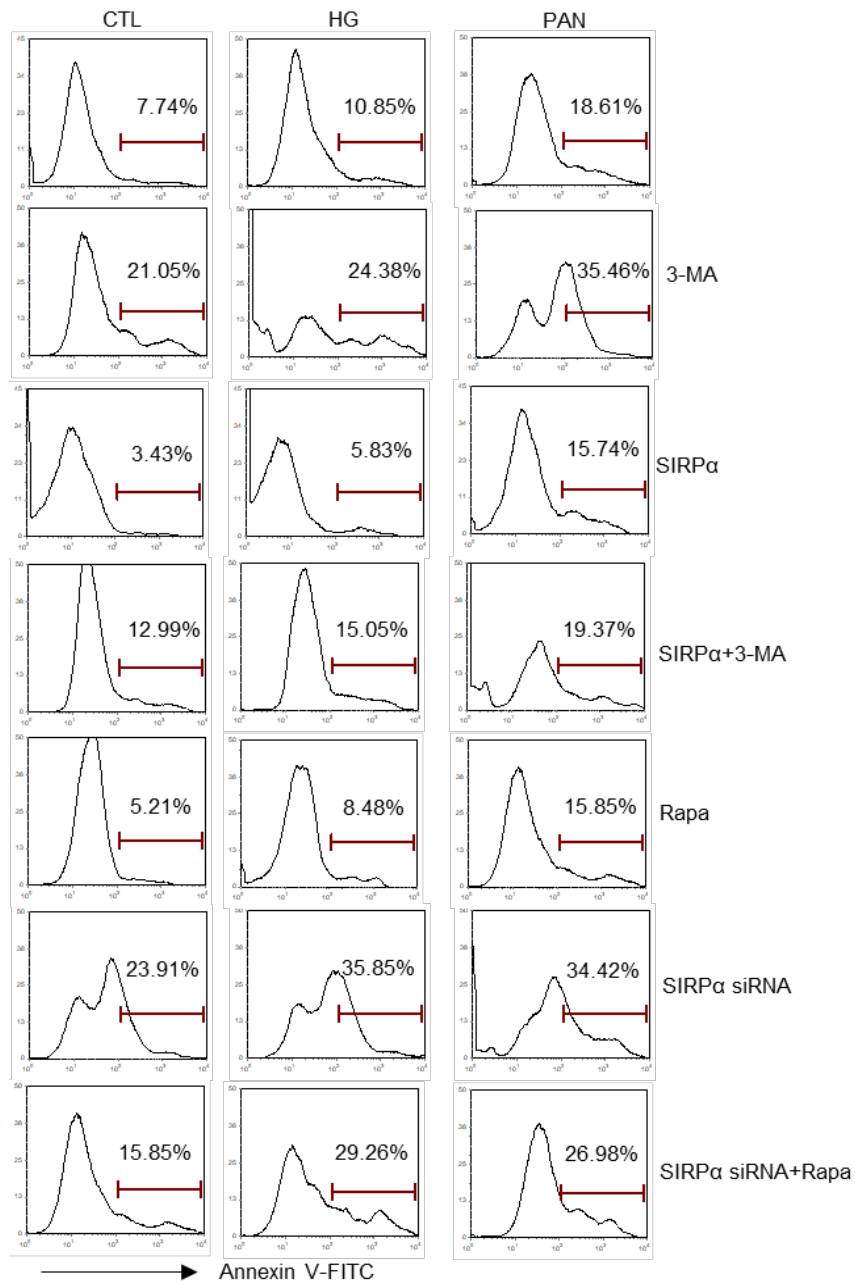

Supplementary Figure 8. Flow cytometry results of PS-positive HPCs with different treatment. The results are representative of 3 independently performed experiments.
